# Supplementary material
Source: publisher figshare collection journal article supplement (https://sage.figshare.com/ndownloader/files/13816979)
Supplement: Supplementary file 1 [file 13816979]

1

## Supplemental Material

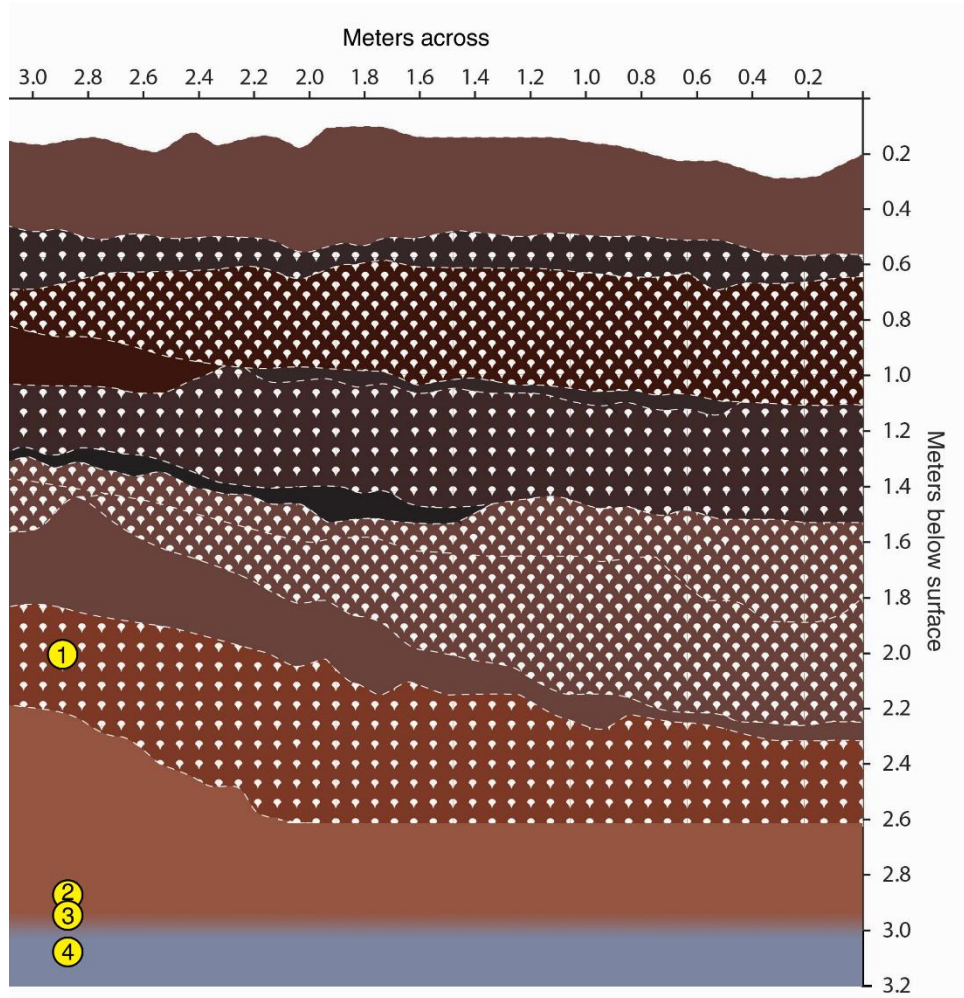

2

3 **Figure S1-** Schematic of archaeological investigation and units. Units with the dots are those  
4 that contained archaeological artifacts. The yellow circles (1-4) are locations where the soil  
5 samples were collected.

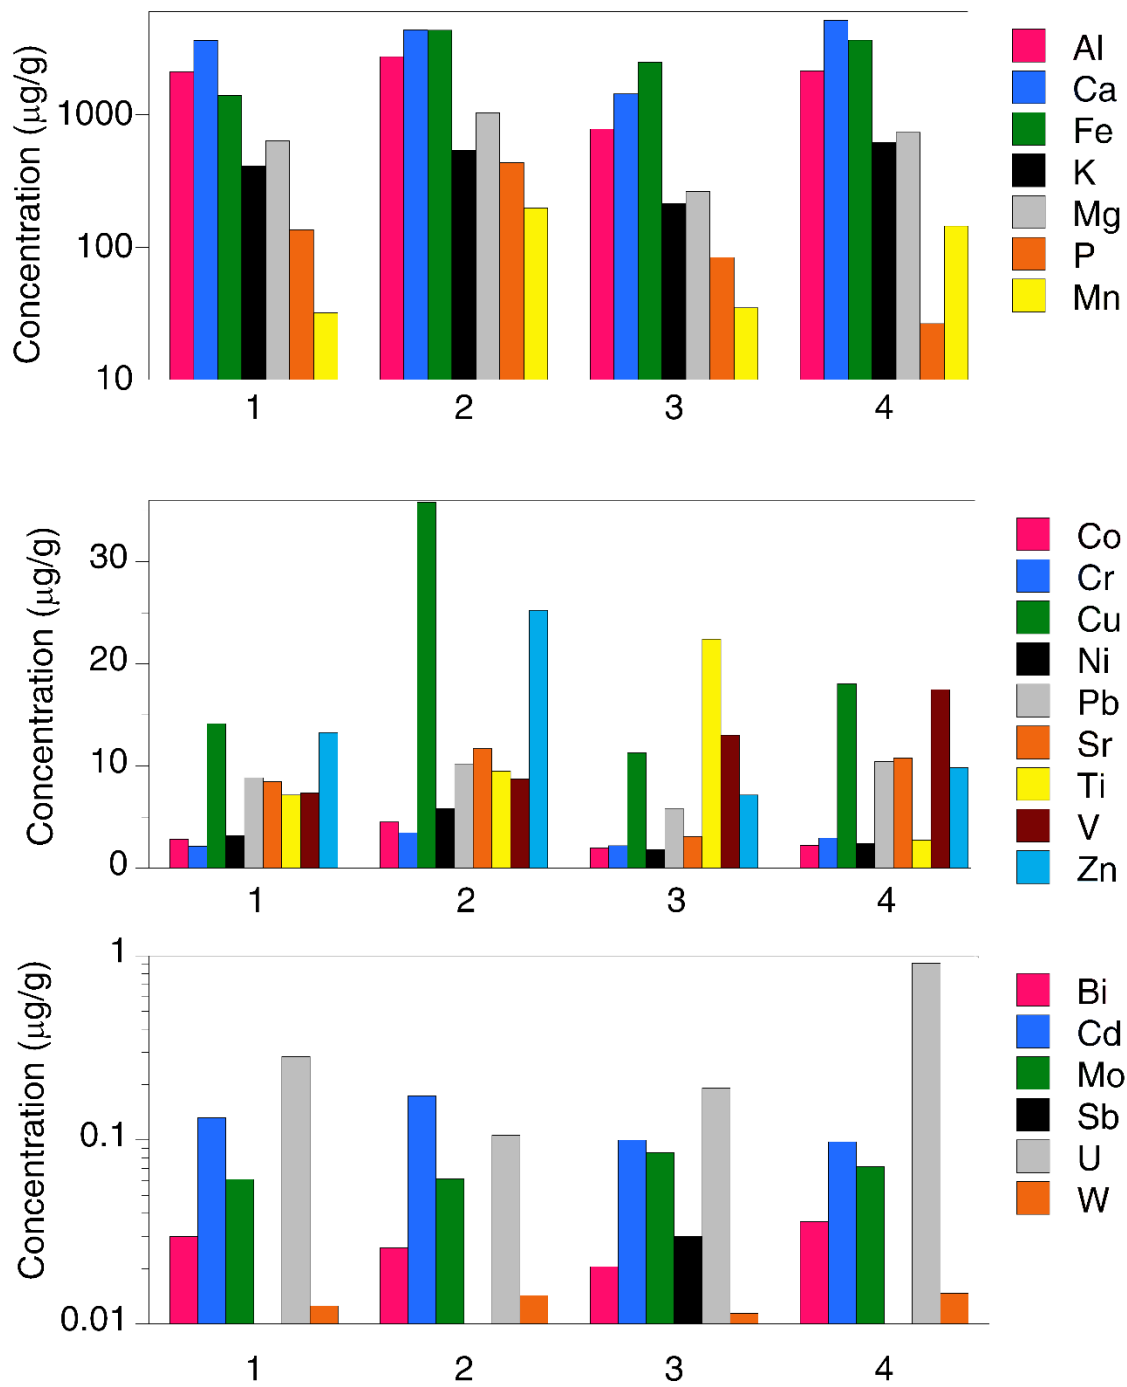

6  
 7 **Figure S2-** Geochemistry of soil samples for A- major elements; B- minor elements; C- trace  
 8 elements.

9  
 10

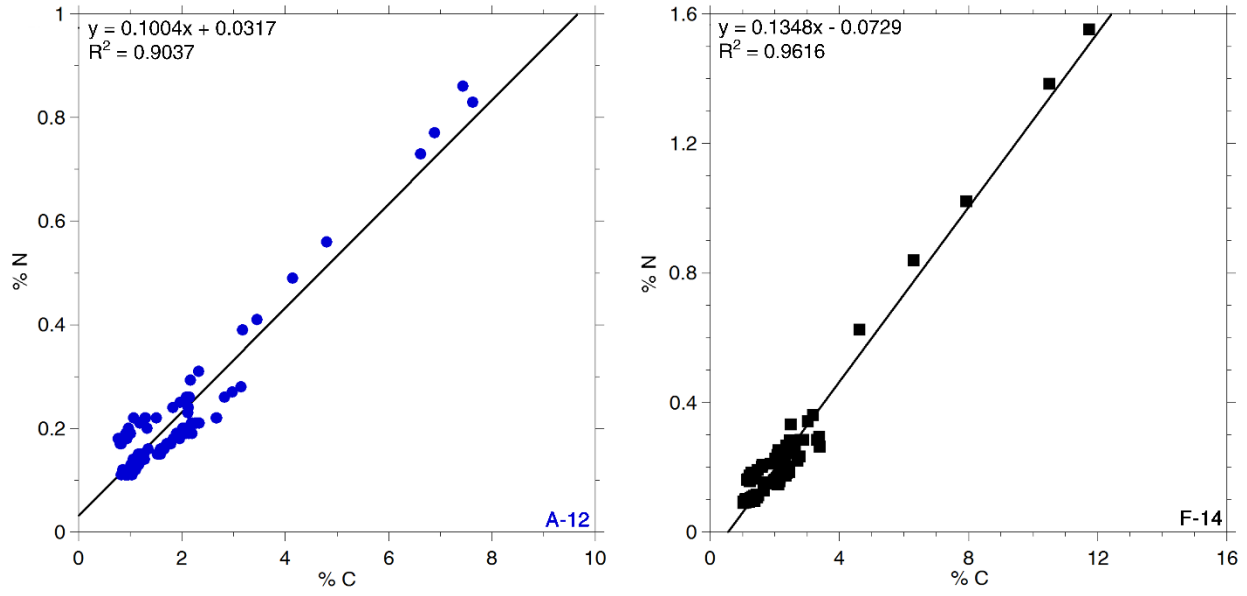

11

12 **Figure S3-** Percent C versus percent N for A-12 cores (left, blue circles) and F-14 cores (right,  
 13 black squares). The y-intercept in the A-12 regression line suggests the influence of inorganic  
 14 nitrogen whereas the F-14 regression line does not.

15

16

17

18

19

20

21

22

23

24

25

26

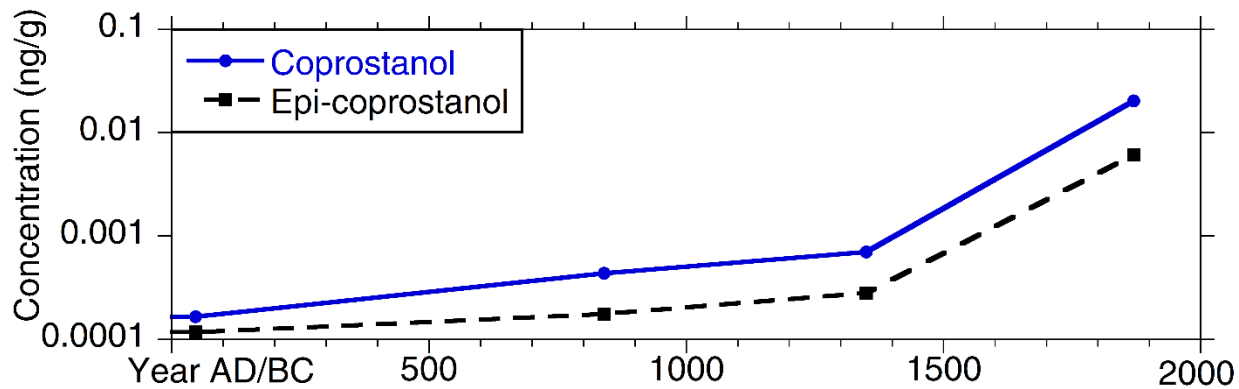

27

28 **Figure S4-** Concentrations of fecal 5β-stanols from Dian A-12 cores that begin to increase by at

29 least 1500 AD.
